# Supplementary material
Source: Springer Nature journal article supplement (https://www.springermedizin.de/resource/supplementary/13000_2012_559_MOESM5_ESM.pdf/9624970)

**a**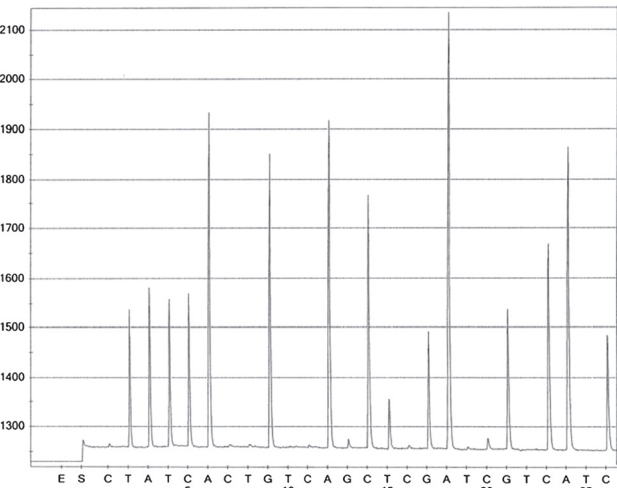**b**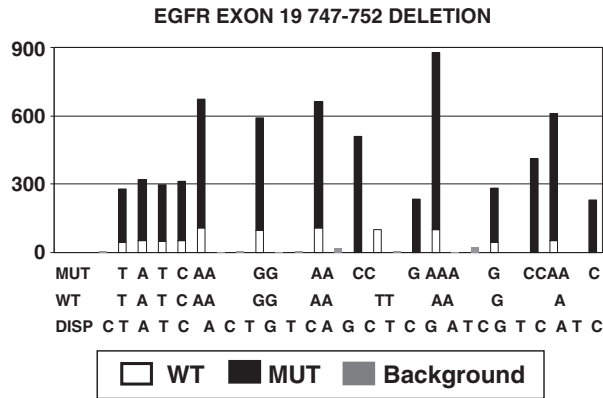

Supplement: MOESM5 [file 9624970]
